# Supplementary material for: Genome-wide shRNA screen revealed integrated mitogenic signaling between dopamine receptor D2 (DRD2) and epidermal growth factor receptor (EGFR) in glioblastoma
Source: PubMed Central journal article supplement (PMC4011590; doi:10.18632/oncotarget.1801), 2014-03-07
Supplement: oncotarget-05-882-s001.pdf [file oncotarget-05-882-s001.pdf]

**Genome-wide shRNA screen revealed integrated mitogenic signaling between dopamine receptor D2 (DRD2) and epidermal growth factor receptor (EGFR) in glioblastoma**

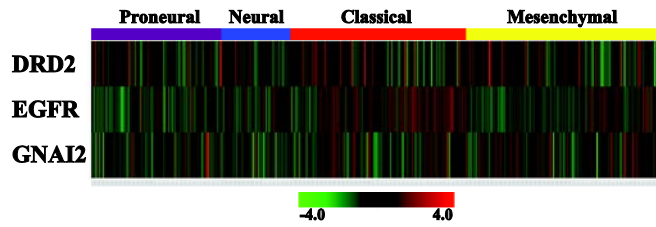

Supplemental Figure 1: Heat map of DRD2, EGFR, and GNAI2 mRNA expression in TCGA glioblastomas.
